# Supplementary material
Source: HighWire-hosted journal article supplement (https://bmjopen.bmj.com/content/8/4/e019540)

Figure A3: Alcohol and healthy ageing-follow-up stratified

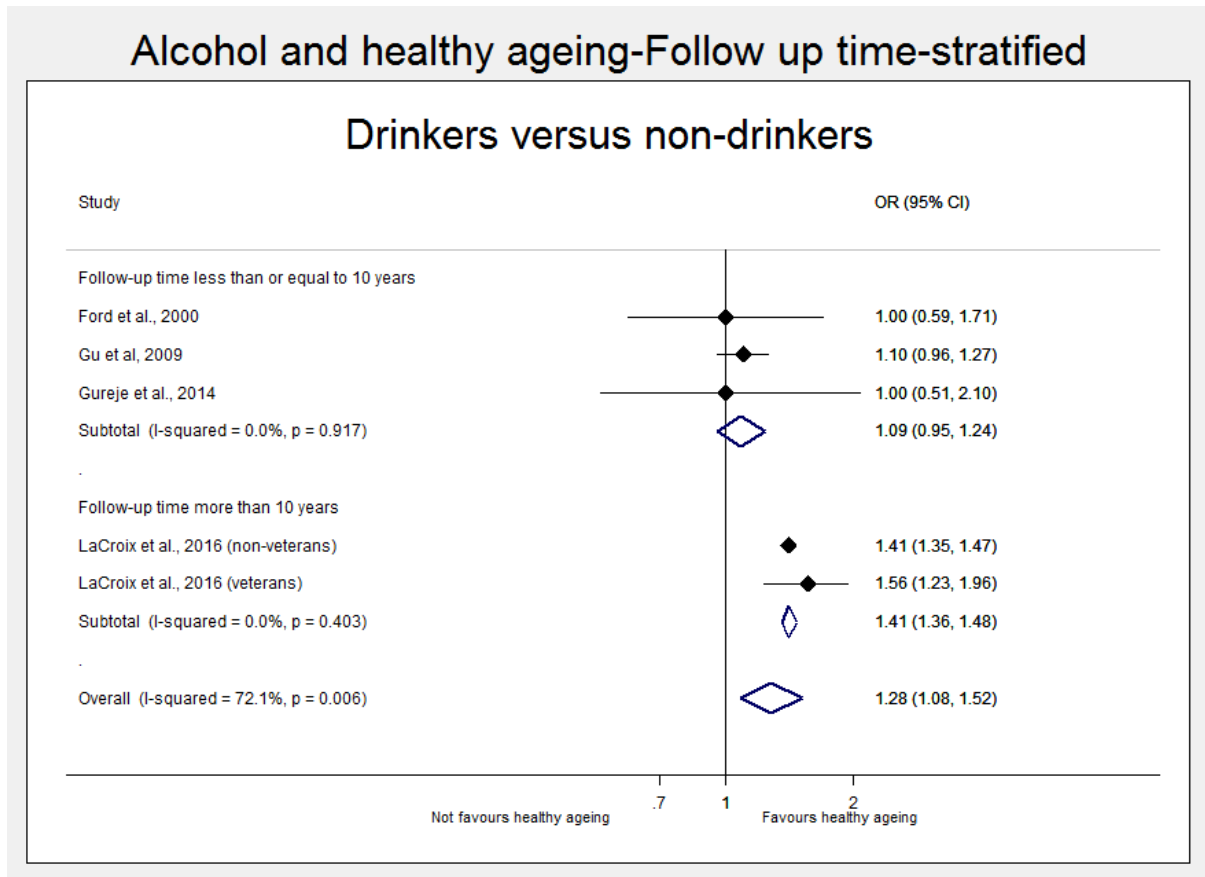

Supplement: inline-supplementary-material-8 [file inline-supplementary-material-8.pdf]
